# Supplementary material
Source: PubMed Central journal article supplement (PMC122545)
Supplement: pnas_99_6_3458__1.pdf [file pnas_99_6_3458__1.pdf]

Supporting information for Márquez *et al.* (2002) *Proc. Natl. Acad. Sci. USA* **99** (6), 3458–3463. (10.1073/pnas.052461499)

**Table 1. Data collection and refinement statistics**

|                                    |                           |                      |         |         |
|------------------------------------|---------------------------|----------------------|---------|---------|
| <b>Space group</b>                 |                           | R32                  |         |         |
| <b>Unit cell</b>                   | a b c, Å                  | 152.240              | 152.240 | 194.686 |
|                                    | $\alpha \beta \gamma$ , ° | 90.00                | 90.00   | 120.00  |
| <b>Data collection</b>             |                           |                      |         |         |
| Resolution, Å                      |                           | 50-1.95 (2.00-1.95)* |         |         |
| Observations                       |                           | 381,615 (25052)      |         |         |
| Unique reflections                 |                           | 62,908 (4551)        |         |         |
| Completeness, %                    |                           | 99.7 (99.8)          |         |         |
| $I/\sigma$                         |                           | 13.5 (4.4)           |         |         |
| $R_{\text{sym}}$ , † %             |                           | 8.4 (33.8)           |         |         |
| $R_{\text{meas}}$ , ‡ %            |                           | 9.1 (37.4)           |         |         |
| <b>Refinement</b>                  |                           |                      |         |         |
| Resolution range, Å                |                           | 50–1.95              |         |         |
| R factor / free R factor, § %      |                           | 22.6 / 24.6          |         |         |
| No. of reflections                 |                           | 62,899               |         |         |
| No. of protein atoms in asym. Unit |                           | 4,506                |         |         |
| No. of water molecules             |                           | 293                  |         |         |
| No. of ligands, molecules/atoms    |                           | 9/32                 |         |         |
| rmsd bond lengths, Å               |                           | 0.0056               |         |         |
| rmsd bond angles, °                |                           | 1.5                  |         |         |
| Average B factor, Å <sup>2</sup>   |                           | 47.9                 |         |         |

\*The number in parentheses refer to the higher resolution shell.

† $R_{\text{sym}} = \sum |I_{hi} - \bar{I}_h| / \sum I_{hi}$ , where  $I_{hi}$  is the scaled intensity of

the  $i$ th symmetry-related observation of reflection  $h$  and  $\bar{I}_h$  is the mean value.

‡Redundancy independent R factor as implemented in XDS.

§The free R factor value was calculated using 10% of reflections randomly chosen and not included in the data refinement.
