# Supplementary material
Source: PubMed Central journal article supplement (PMC122545)

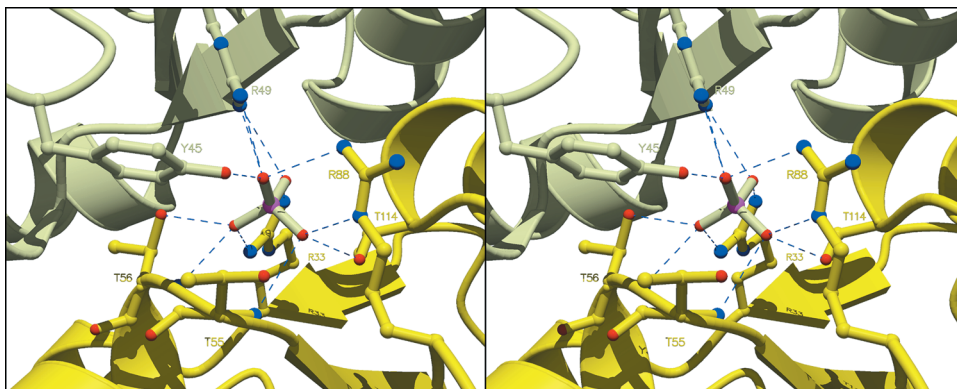

Supplement: pnas_99_6_3458__5.pdf [file pnas_99_6_3458__5.pdf]

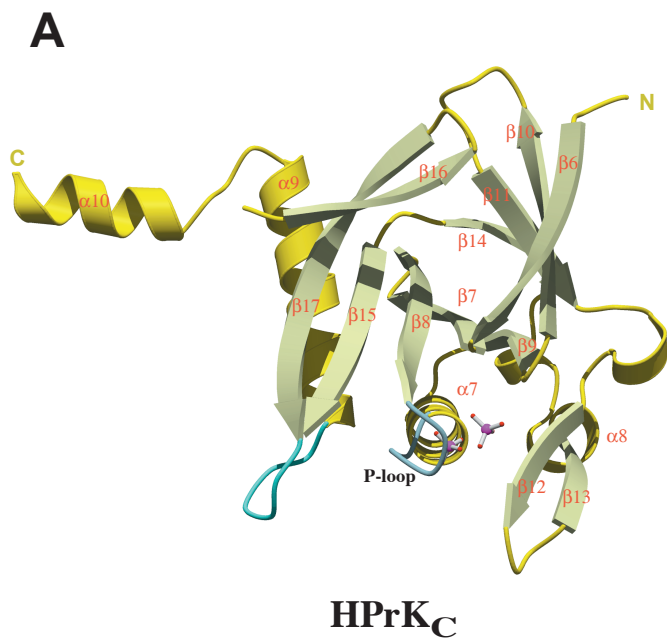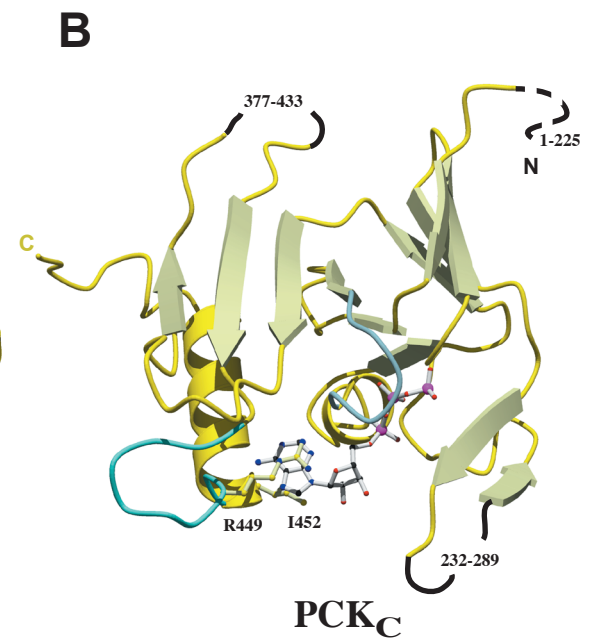

Supplement: pnas_99_6_3458__6.pdf [file pnas_99_6_3458__6.pdf]
